# Supplementary material
Source: PubMed Central journal article supplement (PMC4615603)

# Subtle Dynamic Changes Accompany Hck Activation by HIV-1 Nef and are Reversed by an Antiretroviral Kinase Inhibitor

Thomas E. Wales<sup>1</sup>, James M. Hochrein<sup>1</sup>, Christopher R. Morgan<sup>1</sup>, Lori A. Emert-Sedlak<sup>2</sup>,  
Thomas E. Smithgall<sup>2</sup>, and John R. Engen<sup>1\*</sup>

<sup>1</sup>Department of Chemistry & Chemical Biology, Northeastern University, Boston, MA 02115

<sup>2</sup>Department of Microbiology and Molecular Genetics, University of Pittsburgh School of  
Medicine, Pittsburgh, PA 15219

## **Supplementary Information**

Table S1

Supplemental Figure Legends

Figures S1-S7

**Table S1**

| Construct Numbering | Hck Numbering | Sequence                    | Observed m/z | z | Retention time (min) |
|---------------------|---------------|-----------------------------|--------------|---|----------------------|
| 1-10                | 84-87         | GHHHHHHIIV                  | 633.3234     | 3 | 3.25                 |
| 14-24               | 90-100        | YDYEAIHHEDL                 | 468.872      | 3 | 5.55                 |
| 18-26               | 94-102        | AIHHEDLSF                   | 534.756      | 2 | 5.66                 |
| 25-32               | 101-108       | SFQKGDQM                    | 470.708      | 2 | 4.59                 |
| 36-41               | 112-118       | EESGEW                      | 736.274      | 1 | 6.12                 |
| 42-58               | 119-135       | WKARSLATRKEGYIPSN           | 495.024      | 4 | 4.59                 |
| 42-59               | 119-136       | WKARSLATRKEGYIPSNY          | 535.788      | 4 | 5.02                 |
| 59-66               | 136-143       | YVARVDSL                    | 461.749      | 2 | 5.5                  |
| 60-66               | 137-143       | VARVDSL                     | 380.217      | 2 | 5.04                 |
| 60-67               | 137-144       | VARVDSLE                    | 444.742      | 2 | 4.8                  |
| 72-82               | 149-159       | FFKGISRKDAE                 | 433.234      | 3 | 4.63                 |
| 72-91               | 149-168       | FFKGISRKDAERQLLAPGNM        | 570.313      | 4 | 5.77                 |
| 72-92               | 149-169       | FFKGISRKDAERQLLAPGNML       | 598.582      | 4 | 6.1                  |
| 73-91               | 150-168       | FKGISRKDAERQLLAPGNM         | 533.543      | 4 | 5.42                 |
| 73-92               | 150-169       | FKGISRKDAERQLLAPGNML        | 561.816      | 4 | 5.9                  |
| 76-85               | 153-162       | ISRKDAERQL                  | 608.336      | 2 | 6.42                 |
| 83-91               | 160-168       | RQLLAPGNM                   | 500.273      | 2 | 5.71                 |
| 83-92               | 160-169       | RQLLAPGNML                  | 556.812      | 2 | 6.46                 |
| 96-109              | 173-186       | MIRDSETTKGSYSL              | 529.928      | 3 | 5.2                  |
| 97-109              | 174-186       | IRDSETTKGSYSL               | 728.869      | 2 | 5.02                 |
| 110-135             | 187-212       | SVRDYDPRQGDTVKHYKIRTLDNNGGF | 608.317      | 5 | 5.17                 |
| 116-135             | 193-212       | PRQGDTVKHYKIRTLDNNGGF       | 576.311      | 4 | 5.17                 |
| 136-143             | 213-220       | YISPRSTF                    | 485.751      | 2 | 5.63                 |
| 138-143             | 215-220       | SPRSTF                      | 694.346      | 1 | 5.63                 |
| 147-160             | 224-237       | QELVDHYKKGNDGL              | 539.273      | 3 | 4.75                 |
| 149-160             | 226-237       | LVDHYKKGNDGL                | 453.568      | 3 | 4.33                 |
| 150-160             | 227-237       | VDHYKKGNDGL                 | 415.876      | 3 | 3.92                 |
| 161-166             | 238-243       | CQKLSV                      | 677.356      | 1 | 4.87                 |
| 161-169             | 238-246       | CQKLSVPCM                   | 504.735      | 2 | 6.07                 |
| 170-187             | 247-265       | SSKPQKPWEKDAWEIPRE          | 553.537      | 4 | 5.59                 |
| 170-189             | 247-267       | SSKPQKPWEKDAWEIPRESL        | 603.57       | 4 | 5.94                 |
| 170-191             | 247-269       | SSKPQKPWEKDAWEIPRESLKL      | 531.292      | 5 | 6.04                 |
| 190-200             | 268-278       | KLEKKLGAGQF                 | 406.91       | 3 | 4.65                 |
| 190-204             | 268-282       | KLEKKLGAGQFGEVW             | 563.983      | 3 | 6.05                 |
| 192-204             | 270-282       | EKKLGAGQFGEVW               | 724.875      | 2 | 6.4                  |
| 205-224             | 283-302       | MATYNKHTKVAVKTMKPGSM        | 556.542      | 4 | 4.25                 |
| 208-224             | 286-302       | YNKHTKVAVKTMKPGSM           | 480.759      | 4 | 3.91                 |
| 225-229             | 303-307       | SVEAF                       | 552.26       | 1 | 6.01                 |
| 230-235             | 308-313       | LAEANV                      | 616.324      | 1 | 4.77                 |
| 236-244             | 314-322       | MKTLQHDKL                   | 557.303      | 2 | 4.6                  |
| 245-257             | 323-335       | VKLHAVVTKEPIY               | 499.629      | 3 | 4.98                 |
| 248-257             | 326-335       | HAVVTKEPIY                  | 578.818      | 2 | 4.76                 |
| 258-262             | 336-340       | IITEF                       | 622.339      | 1 | 6.73                 |
| 262-268             | 340-346       | FMAKGS�                     | 377.197      | 2 | 5.3                  |
| 262-269             | 340-347       | FMAKGSLL                    | 433.74       | 2 | 6.24                 |
| 263-270             | 341-348       | MAKGSLLD                    | 417.722      | 2 | 5.3                  |
| 271-285             | 349-363       | FLKSDEGSKQPLPKL             | 562.985      | 3 | 5.24                 |
| 272-285             | 350-363       | LKSDEGSKQPLPKL              | 513.962      | 3 | 4.93                 |
| 273-285             | 351-363       | KSDEGSKQPLPKL               | 476.265      | 3 | 4.85                 |
| 275-292             | 353-370       | DEGSKQPLPKLIDFSAQI          | 662.693      | 3 | 6.34                 |
| 292-298             | 370-376       | IAEGMAF                     | 738.344      | 1 | 6.78                 |
| 299-311             | 377-389       | IEQRNYIHRDLRA               | 561.969      | 3 | 4.35                 |
| 304-313             | 382-391       | YIHRDLRAAN                  | 410.221      | 3 | 3.89                 |
| 314-320             | 392-398       | ILVSASL                     | 702.437      | 1 | 6.38                 |
| 321-326             | 399-404       | VCKIAD                      | 648.333      | 1 | 4.22                 |
| 321-329             | 399-407       | VCKIADFGL                   | 483.257      | 2 | 6.93                 |

Table S1 (continued)

| Construct Numbering | Hck Numbering | Sequence             | Observed m/z | z | Retention time (min) |
|---------------------|---------------|----------------------|--------------|---|----------------------|
| 330-346             | 408-424       | ARVIEDNEYTAREGAKF    | 683.6565     | 3 | 5.01                 |
| 330-337             | 408-415       | ARVIEDNE             | 473.232      | 2 | 4.06                 |
| 339-36              | 417-424       | TAREGAKF             | 440.233      | 2 | 4.52                 |
| 347-358             | 425-436       | PIKWTAPEAINF         | 693.868      | 2 | 6.99                 |
| 362-367             | 440-445       | TIKSDV               | 331.687      | 2 | 4.16                 |
| 362-370             | 440-448       | TIKSDVVSF            | 541.776      | 2 | 7.13                 |
| 377-393             | 455-471       | IVTYGRIPYPGMSNPEV    | 631.657      | 3 | 6.47                 |
| 377-396             | 455-474       | IVTYGRIPYPGMSNPEVIRA | 745.068      | 3 | 6.13                 |
| 380-393             | 458-471       | YGRIPYPGMSNPEV       | 790.379      | 2 | 6.06                 |
| 380-396             | 458-474       | YGRIPYPGMSNPEVIRA    | 640.663      | 3 | 5.86                 |
| 397-413             | 475-491       | LERGYRMPRPENCPEEL    | 697.005      | 3 | 5.51                 |
| 401-409             | 479-487       | YRMPRPENC            | 583.266      | 2 | 4.89                 |
| 401-413             | 479-491       | YRMPRPENCPEEL        | 545.257      | 3 | 5.69                 |
| 421-432             | 499-510       | WKNRPEERPTFE         | 530.267      | 3 | 4.75                 |
| 432-438             | 510-516       | EYIQSVL              | 851.45       | 1 | 6.73                 |
| 433-438             | 511-516       | YIQSVL               | 722.4        | 1 | 6.5                  |

## SUPPLEMENTAL FIGURE LEGENDS

**Figure S1.** Intact mass analysis of Hck-YEEI following incubation with ATP. (A) Electrospray mass spectra of recombinant Hck-YEEI before (- ATP) and after (+ ATP) incubation with ATP/Mg<sup>++</sup>. Lines are shown above the spectrum to indicate the masses of the “base” protein peak as well as the phosphorylated forms (+80 Da per phosphate). The peak indicated with “base” is acetylated (+42 Da); dotted lines show the positions of the three deacetylated species. (B). Tryptic phosphopeptide mapping of Hck-YEEI. The mass spectrum of the tryptic peptide at the C-terminal tail bearing Tyr527 is shown at the top (+3 charge state). The spectrum remains the same in the presence or absence of ATP. Mass spectra of the tryptic peptides containing activation loop Tyr416 are shown in the bottom panels (+2 charge state). The unphosphorylated and phosphorylated peptides elute at different times chromatographically.

**Figure S2.** Map of the peptic peptides identified for Hck-YEEI and monitored during HX experiments. The peptides followed in the HX experiments cover 86% of the linear sequence. The phosphorylated peptide found only in the Hck-YEEI + ATP and + ATP/Nef samples is indicated by the red bar. Numbering is based on the position of each amino acid in the recombinant Hck-YEEI construct used for HX MS analysis (see also Table S1).

**Figure S3.** Example mass spectra for deuterium exchange into the peptides shown in Figure 5. In each panel, exchange into Hck-YEEI is shown at the left, into Hck-YEEI + Nef + ATP in the middle and Hck-YEEI + Nef + DFP-4AB at the right.

**Figure S4.** Deuterium incorporation plots comparing Hck-YEEI with both Hck-YEEI + ATP and Hck-YEEI + DFP-4AB. Amino acids included in each peptide are shown at the top and correspond to the sequence of Hck-YEEI numbered as per the X-ray crystal structure (PDB: 1QCF). Numbers in parenthesis correspond to the amino acid location in the recombinant Hck-YEEI construct used for HX MS analysis. For example, the first peptide contains the N-terminal His-tag followed by three Hck-derived amino acids. Table S1 provides the amino acid sequences of each peptide. Data are the average of two separate HX MS experiments.

**Figure S5.** Changes to deuterium incorporation in Hck-YEEI in the presence of small molecule ligands. Deuterium incorporation plots for Hck-YEEI alone, in the presence of ATP/Mg<sup>++</sup>, or DFP-4AB. Each graph indicates relative deuterium uptake with time (0.1-1000 min) and all axes labels are the same as those presented for peptide 286-302. Data are shown for the SH3 and SH2 reporter peptides, two peptides near the ATP binding pocket, and three peptides presented in main Figure 5. The sequence numbers that are included on the plots are color matched with their presentation on the cartoon model structure of Hck-YEEI to the right of the plots. The error of measuring the deuterium incorporation for each peptide was  $\pm 0.2$  Da and is indicated using error bars for each time point.

**Figure S6.** Deuterium incorporation plots comparing Hck-YEEI with both Hck-YEEI + Nef + ATP and Hck-YEEI + Nef + DFP-4AB. Amino acids included in each peptide are shown at the top and correspond to the sequence of Hck-YEEI numbered as per the X-ray crystal structure (PDB: 1QCF). Numbers in parenthesis correspond to the amino acid location in the recombinant Hck-YEEI construct used for HX MS analysis. Peptide sequences are presented in Table S1. Data are the average of two separate HX MS experiments.

**Figure S7.** Differences in deuteration for the peptides shown in Figure S6. The deuterium levels (D) in Figure S6 were subtracted as shown at the bottom and colored according to the legend shown. Differences of less than 0.5 Da were not considered meaningful and are shown as gray.

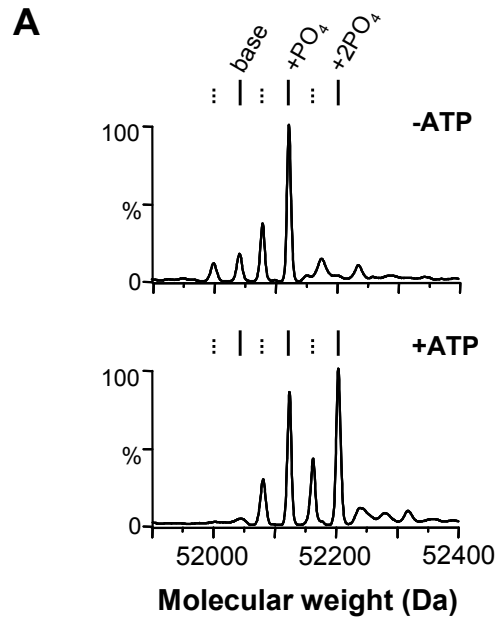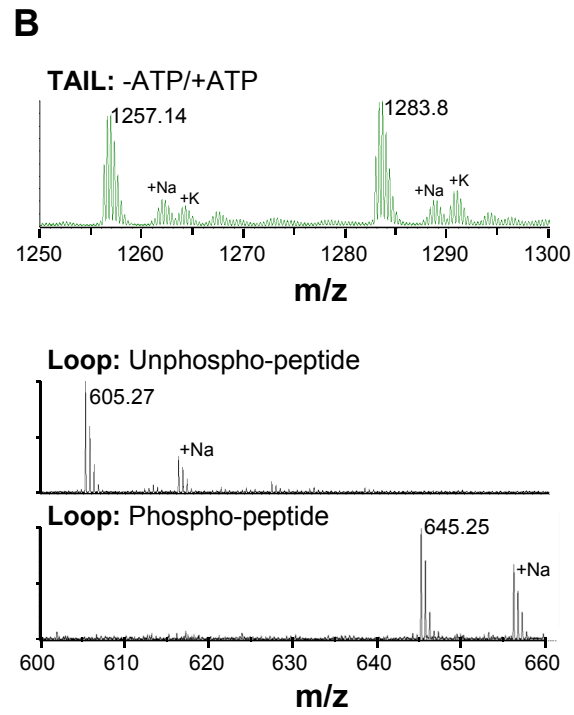

Supplementary Figure S1

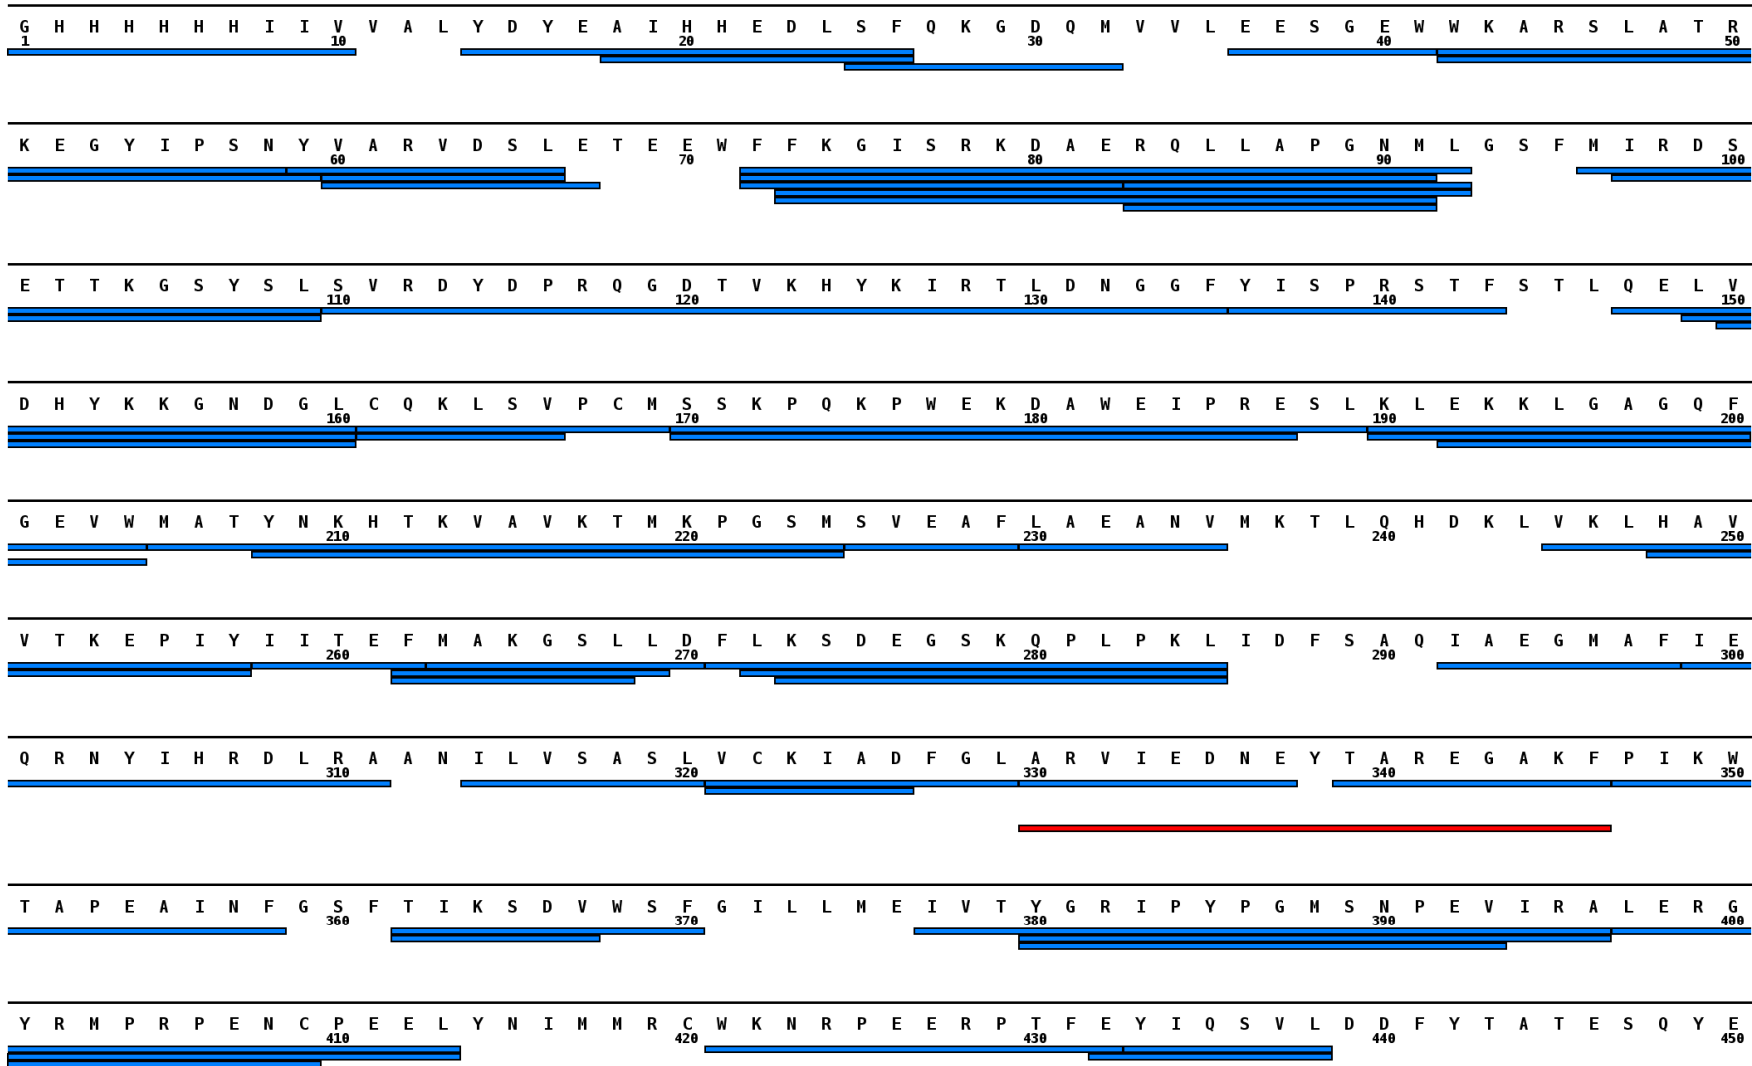

E I P  
453

hNckYEEI: 388 of 453 ~ 86%  
pY: 17 of 453 ~ 4%  
Total: 389 of 453 ~ 86%

Supplementary Figure S2



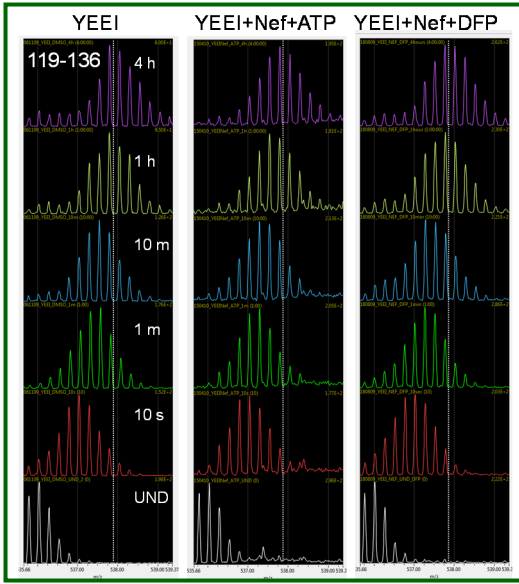

Supplementary Figure S3

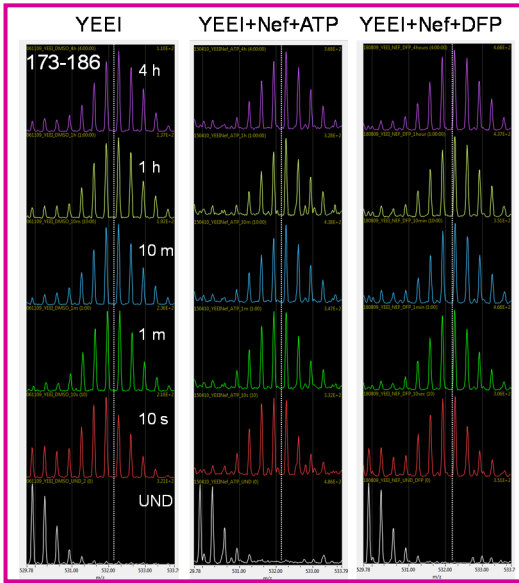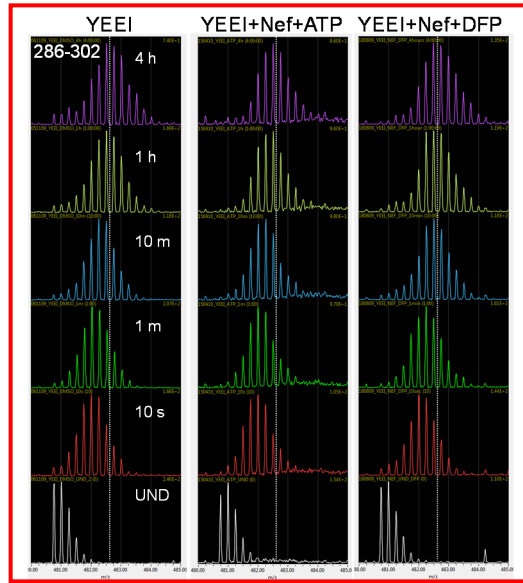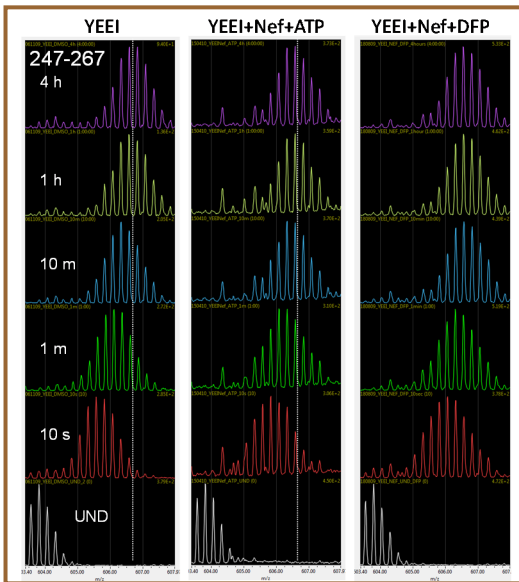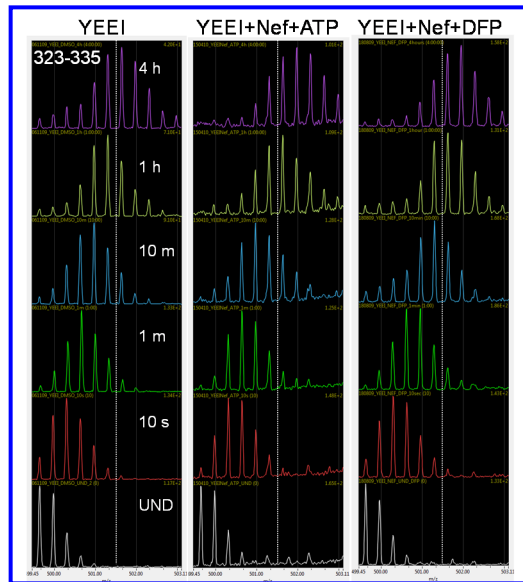

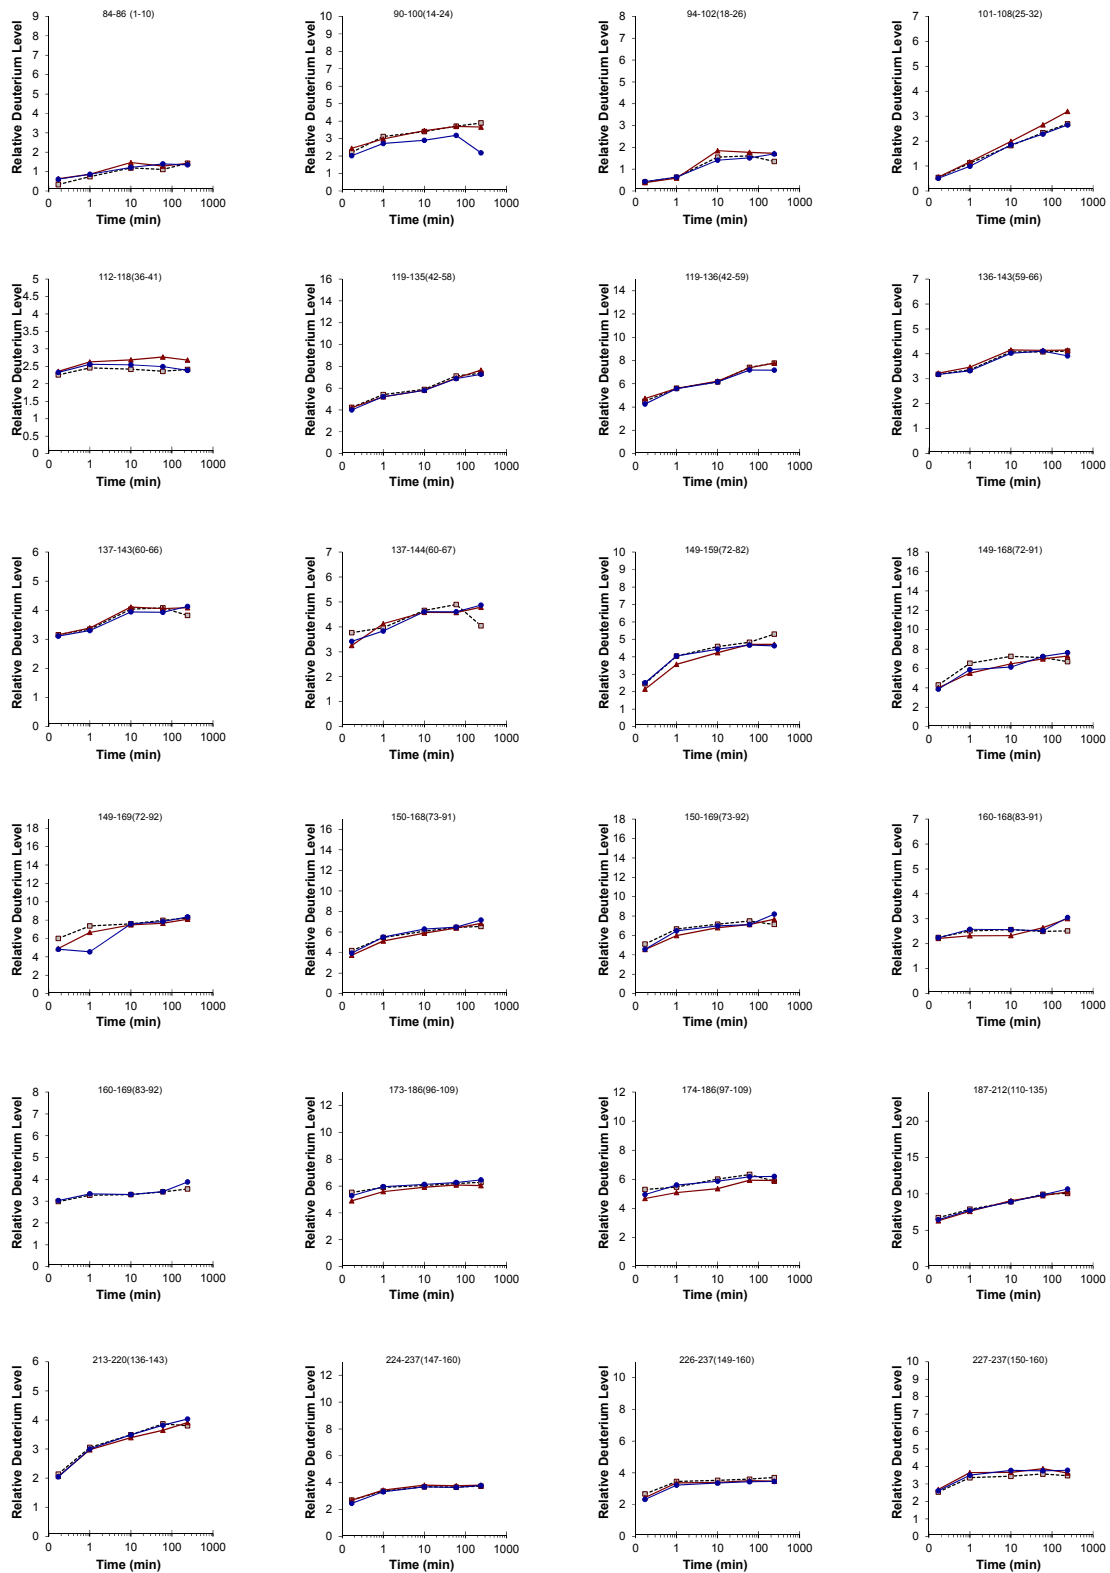

-□- YEEI  
 -●- YEEI+ATP  
 -▲- YEEI+DFP

Supplementary Figure S4

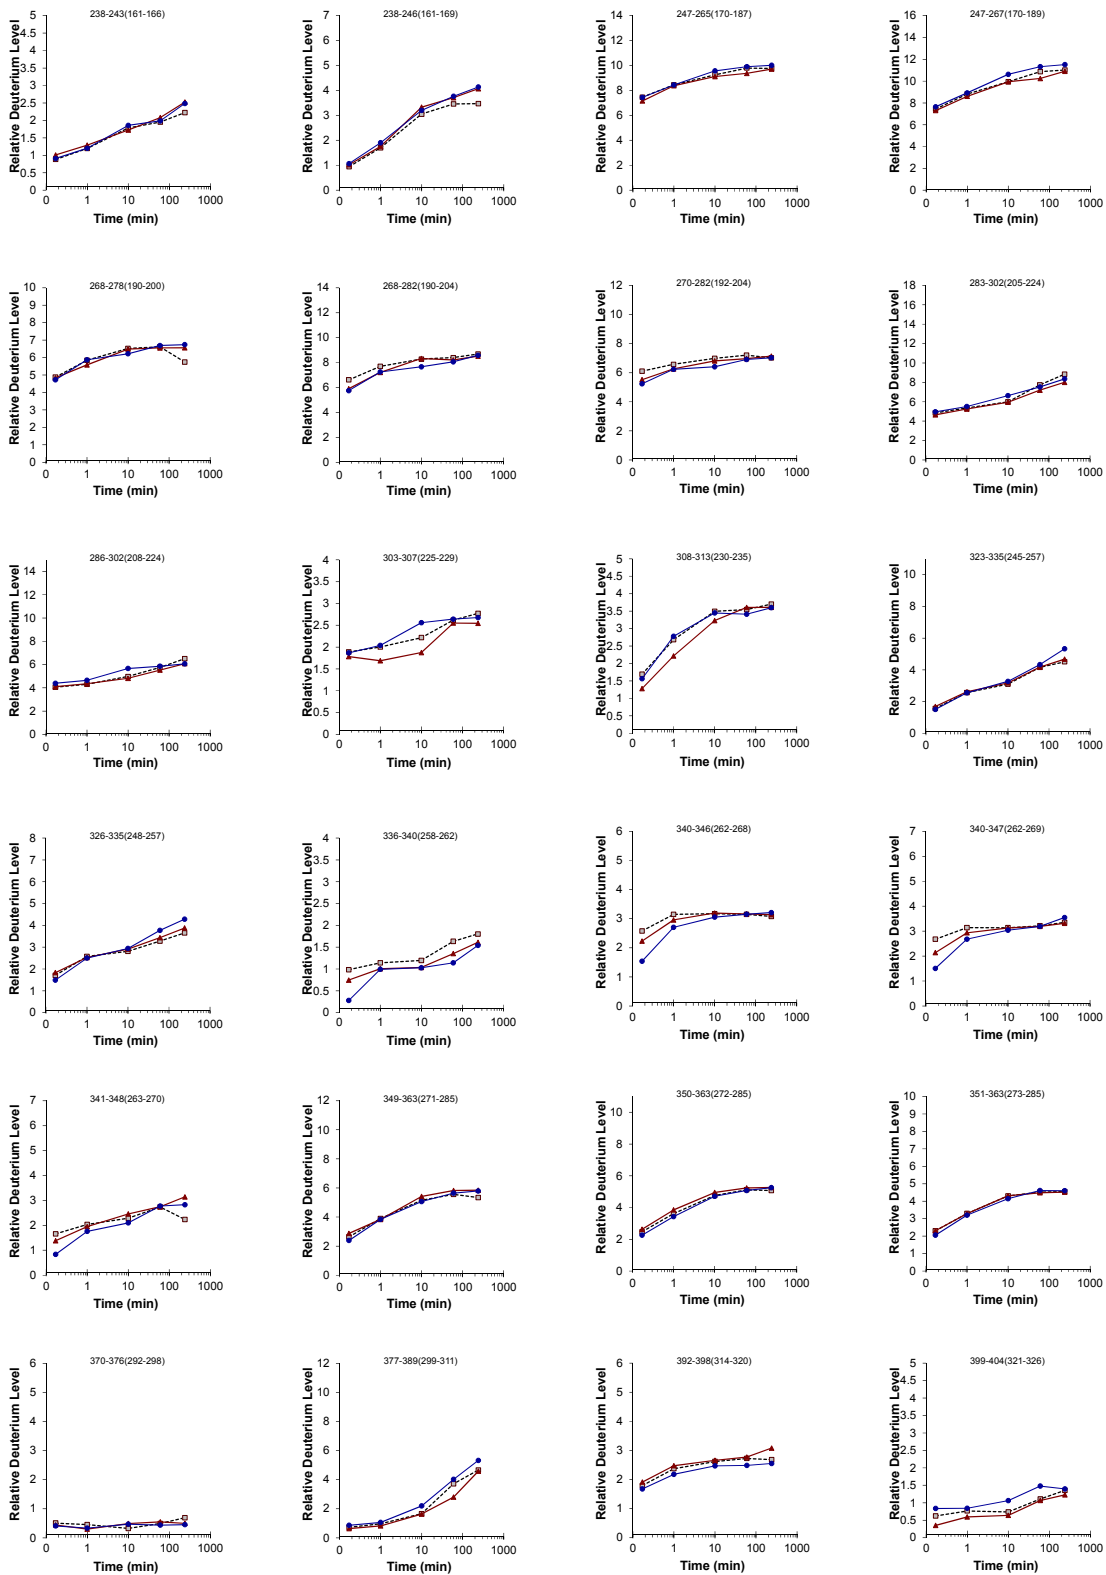

-□- YEEI  
 -●- YEEI+ATP  
 -▲- YEEI+DFP

Supplementary Figure S4

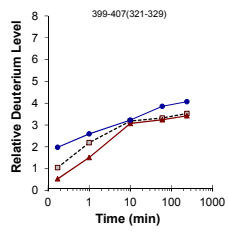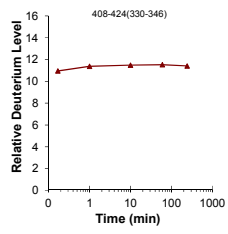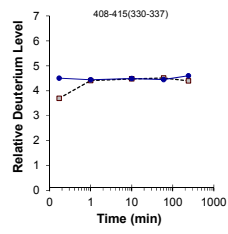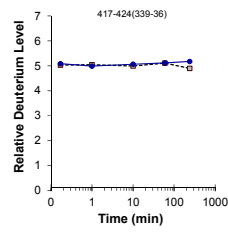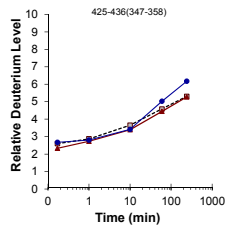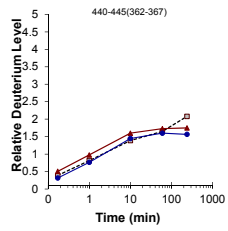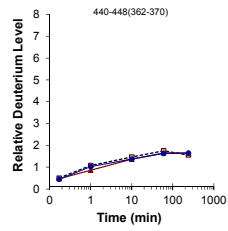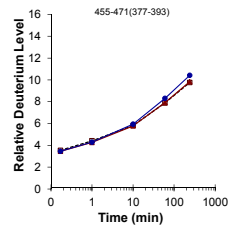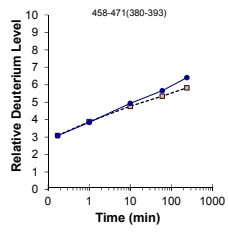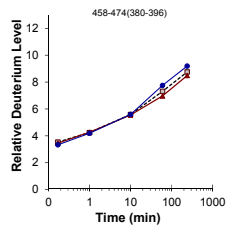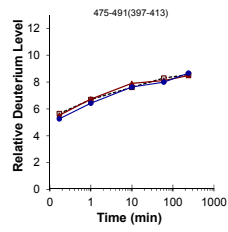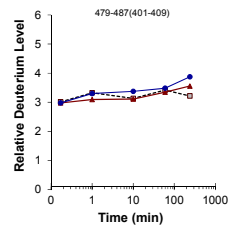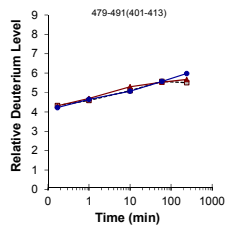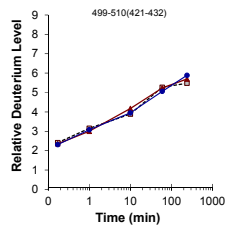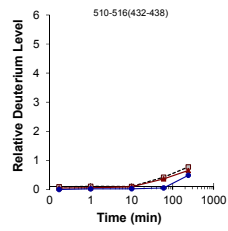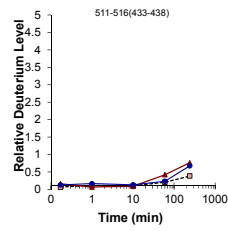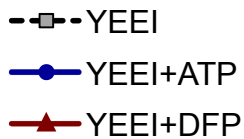

Supplementary Figure S4

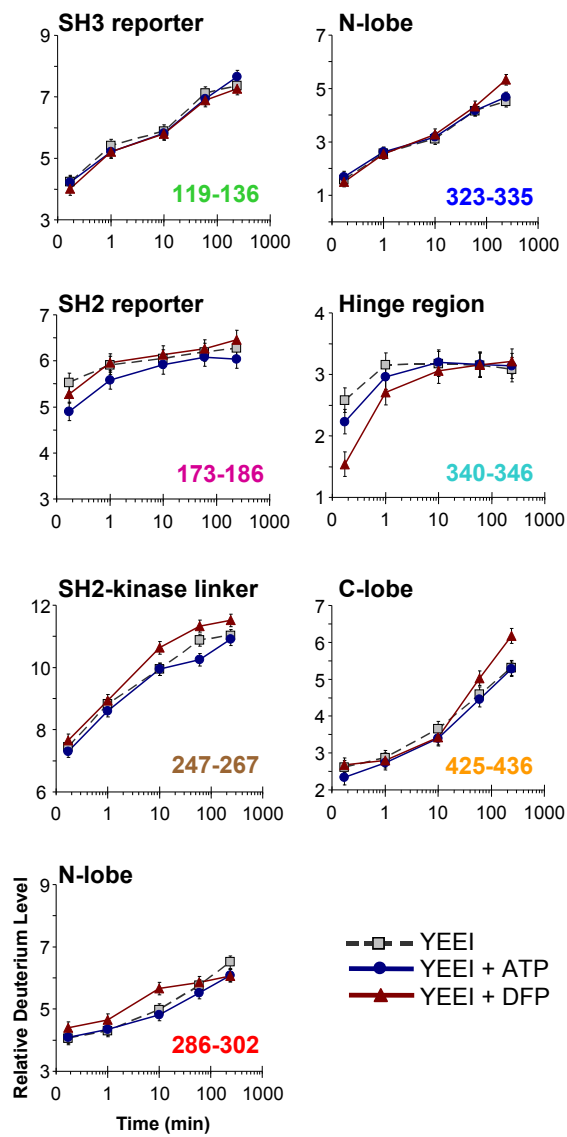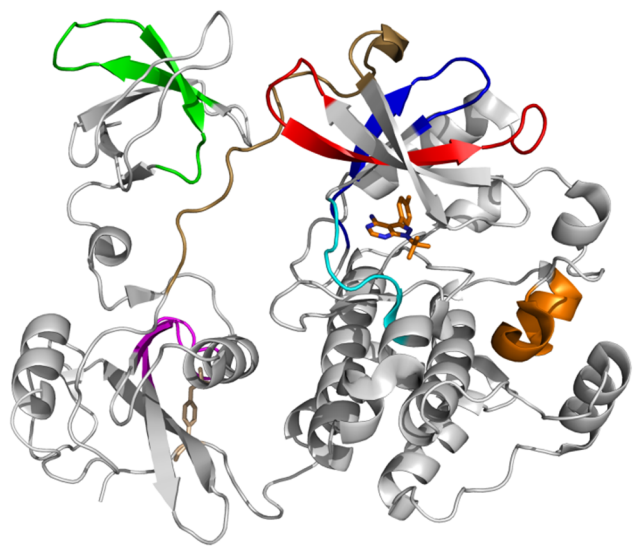

Supplementary Figure S5

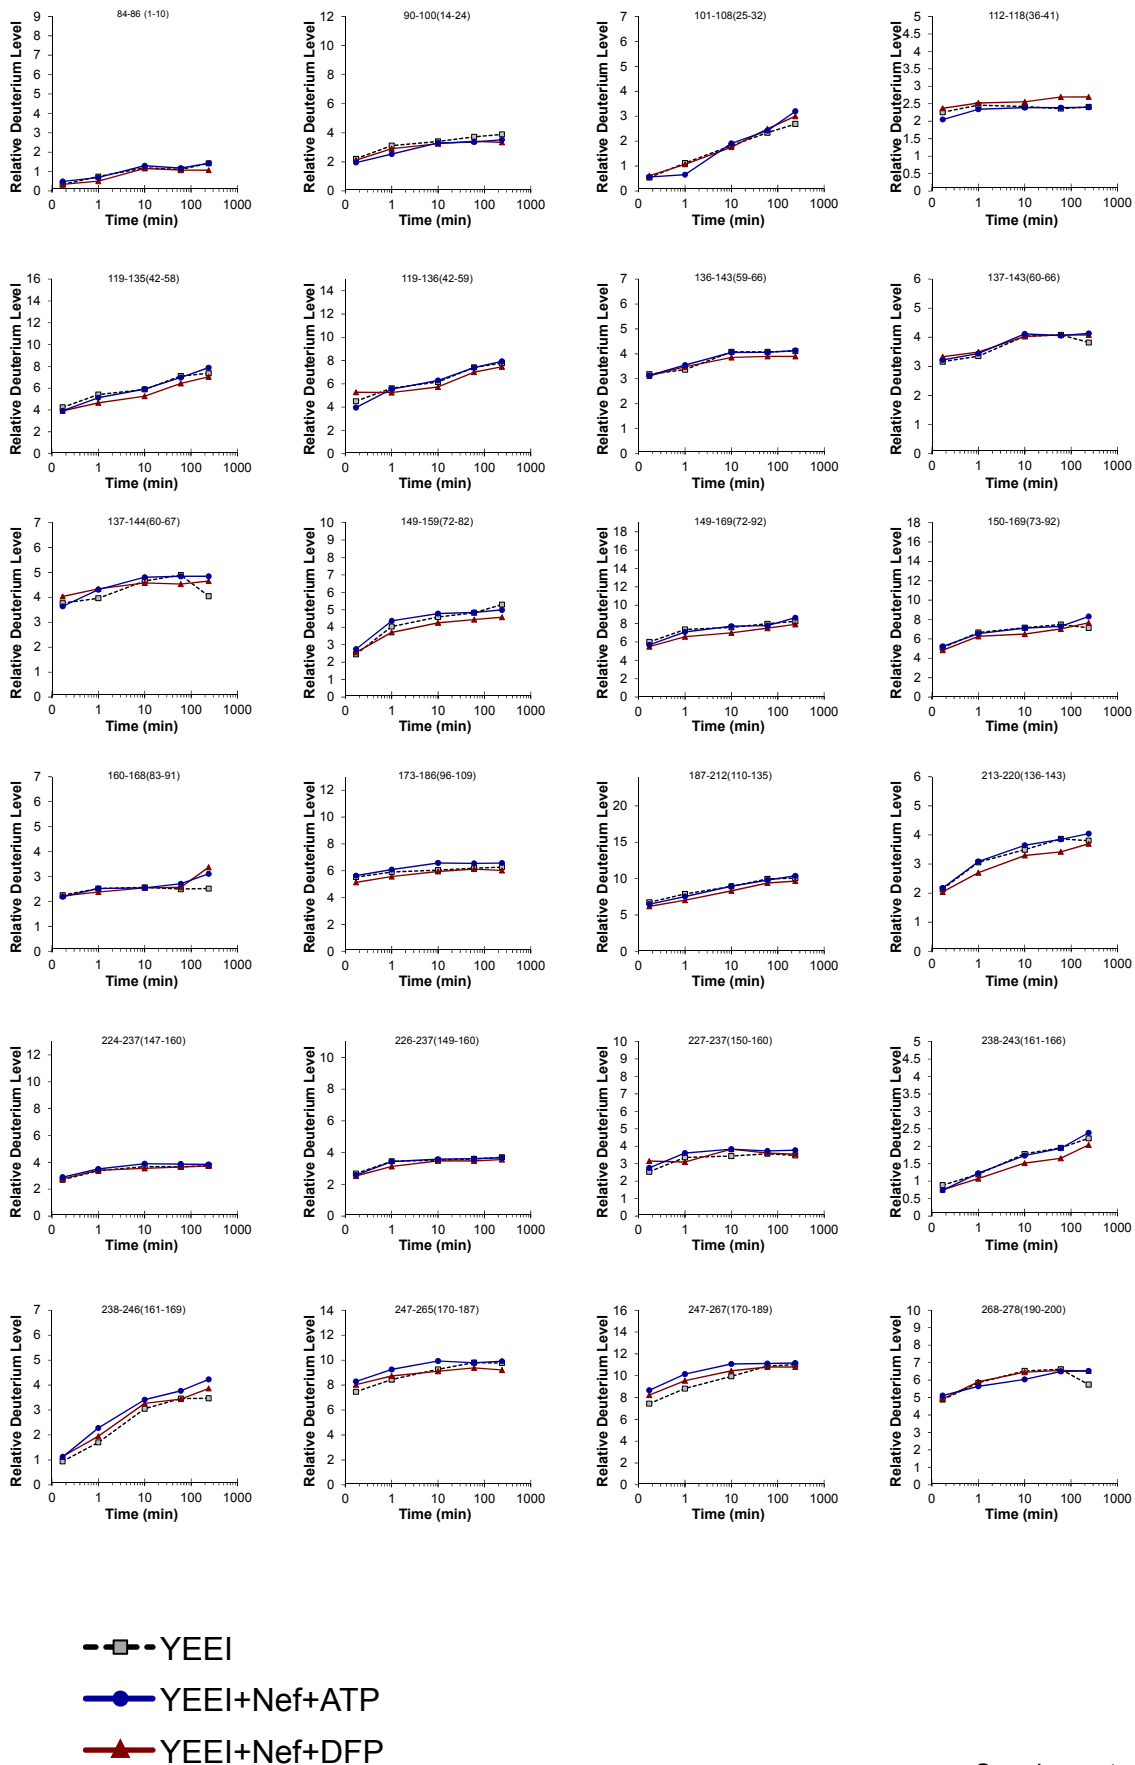

Supplementary Figure S6

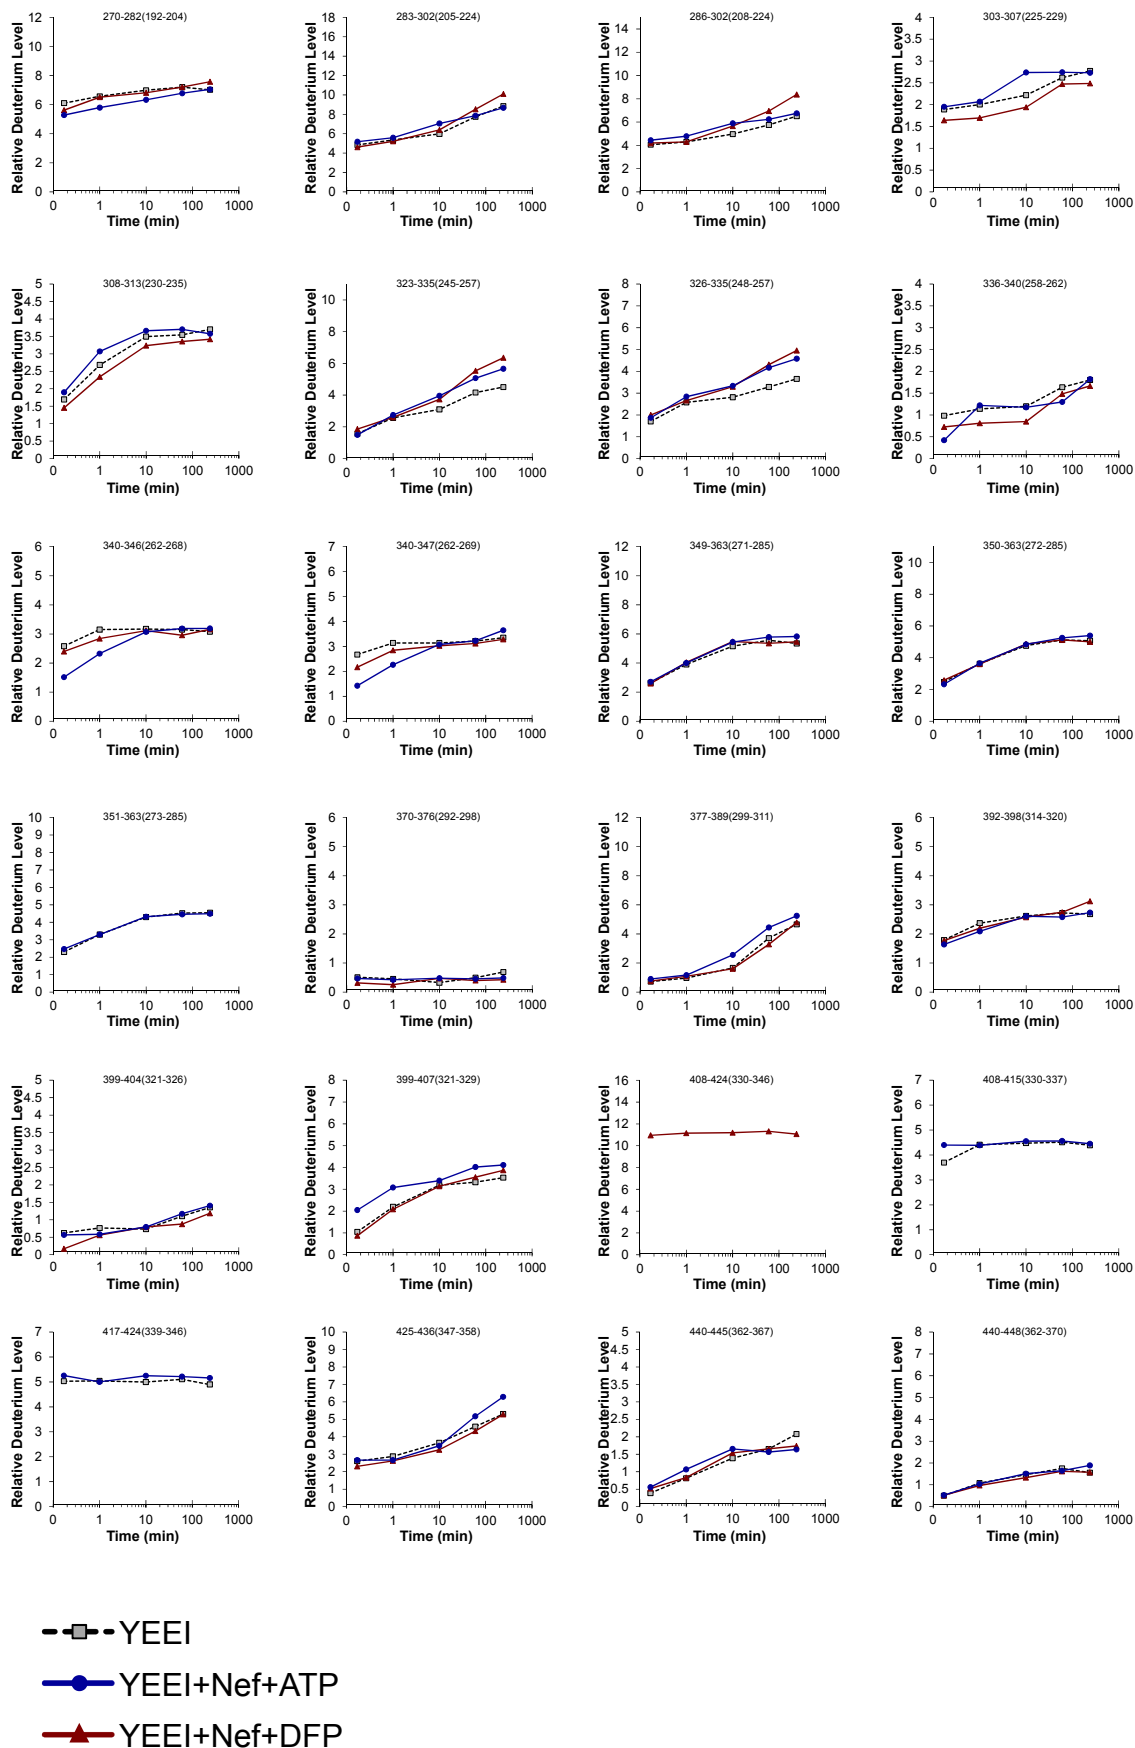

Supplementary Figure S6

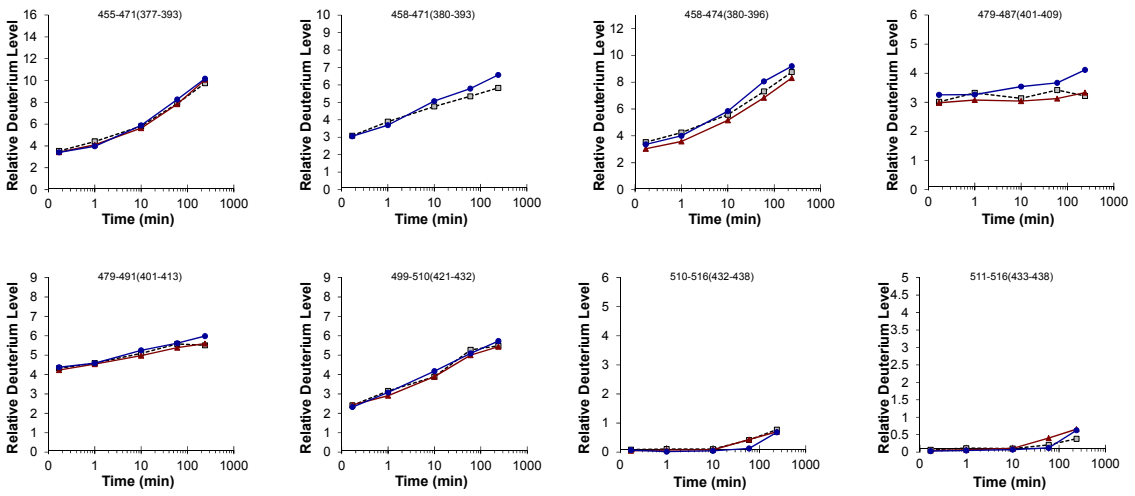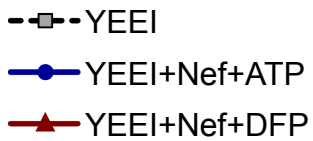

Supplementary Figure S6



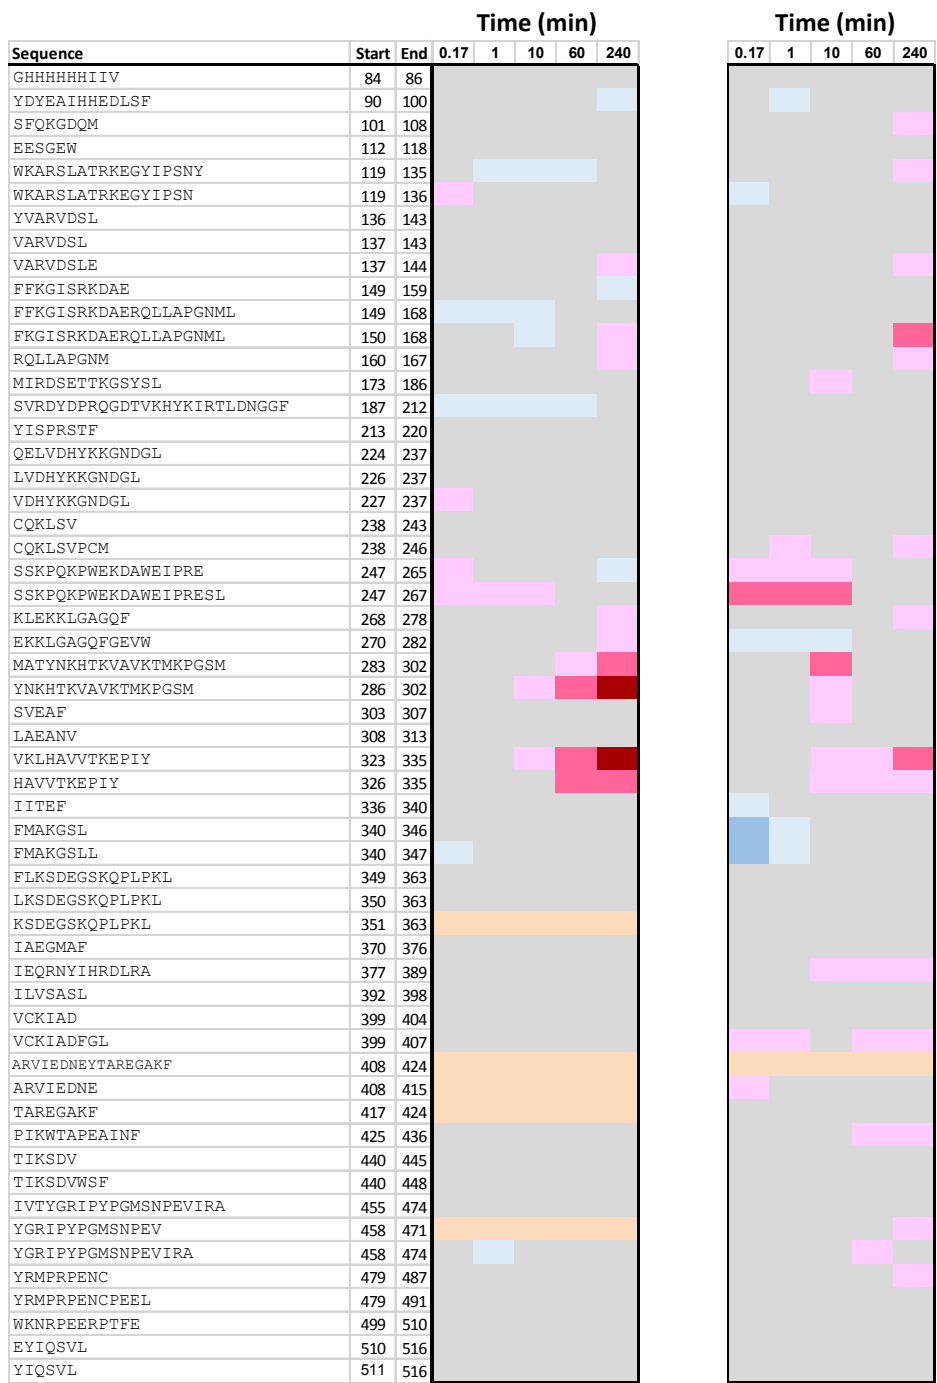

D level difference (in Da) →

$$D_{YEEI} - D_{YEEI+Nef+ATP}$$

$$D_{YEEI} - D_{YEEI+Nef+DFP}$$

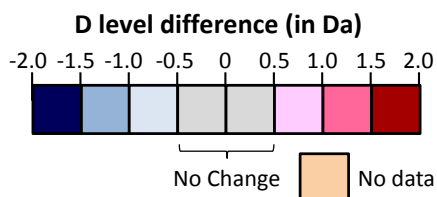

Supplement: NIHMS727483-supplement-Supplemental.pdf [file NIHMS727483-supplement-Supplemental.pdf]
